# Supplementary material
Source: Springer Nature journal article supplement (https://www.springermedizin.de/resource/supplementary/12936_2012_2582_MOESM1_ESM.pdf/9543294)
Supplement: MOESM1 [file 9543294]

Additional file 1: Representative Pre and Post-Purification Sporozoite Numbers Tested in Optimal Conditions

*Plasmodium yoelii* sporozoites

| Trial # | # Sporozoites Pre-Purification | # Sporozoites Post-Purification | % Recovery |
|---------|--------------------------------|---------------------------------|------------|
| 1       | 1.14E+07                       | 1.03E+07                        | 90.4       |
| 2       | 9.56E+06                       | 6.76E+06                        | 70.7       |
| 3       | 8.90E+06                       | 8.10E+06                        | 91.0       |
| 4       | 8.40E+06                       | 7.10E+06                        | 84.5       |
| 5       | 7.76E+06                       | 6.70E+06                        | 86.3       |
| 6       | 5.60E+06                       | 5.21E+06                        | 93.0       |
| 7       | 4.50E+06                       | 2.90E+06                        | 64.4       |
| 8       | 2.10E+06                       | 1.40E+06                        | 66.7       |
| 9       | 1.30E+06                       | 8.75E+05                        | 67.3       |
| 10      | 1.00E+05                       | 8.95E+04                        | 89.5       |

|                    |               |
|--------------------|---------------|
| Average % Recovery | 80.4 +/- 11.6 |
|--------------------|---------------|

*Plasmodium falciparum* sporozoites

| Trial # | # Sporozoites Pre-Purification | # Sporozoites Post-Purification | % Recovery |
|---------|--------------------------------|---------------------------------|------------|
| 1       | 2.12E+07                       | 1.67E+07                        | 78.9       |
| 2       | 1.32E+07                       | 9.87E+06                        | 74.5       |
| 3       | 9.56E+06                       | 7.86E+06                        | 82.2       |
| 4       | 7.45E+06                       | 6.81E+06                        | 91.4       |
| 5       | 6.57E+06                       | 5.37E+06                        | 81.7       |
| 6       | 6.46E+06                       | 5.20E+06                        | 80.5       |
| 7       | 5.40E+06                       | 4.30E+06                        | 79.6       |
| 8       | 4.50E+06                       | 4.08E+06                        | 90.7       |
| 9       | 5.00E+05                       | 3.74E+05                        | 74.8       |
| 10      | 3.00E+05                       | 2.35E+05                        | 78.3       |

|                    |               |
|--------------------|---------------|
| Average % Recovery | 81.3 +/- 5.74 |
|--------------------|---------------|

*Plasmodium vivax* sporozoites

| Trial # | # Sporozoites Pre-Purification | # Sporozoites Post-Purification | % Recovery |
|---------|--------------------------------|---------------------------------|------------|
| 1       | 2.50E+06                       | 1.37E+06                        | 54.8       |
| 2       | 2.22E+06                       | 1.52E+06                        | 68.5       |
| 3       | 1.33E+06                       | 8.30E+05                        | 62.4       |

|                    |               |
|--------------------|---------------|
| Average % Recovery | 61.9 +/- 6.86 |
|--------------------|---------------|
